# Supplementary material for: Applicant and Program Director Perceptions of Second Look Events During the 2023 Radiation Oncology Residency Match
Source: PubMed Central journal article supplement — Adv Radiat Oncol. 2024 Feb 16;9(6):101473. doi: 10.1016/j.adro.2024.101473 (PMC11043851; doi:10.1016/j.adro.2024.101473), 2024-02-16
Supplement: mmc1.pdf [file mmc1.pdf]

# Applicant Survey

**You are being asked to participate in a voluntary research study. The purpose of the study is to investigate the impact of Second Look events that were hosted by Radiation Oncology residency programs during the 2022-2023 Match cycle, and to understand applicant satisfaction or dissatisfaction regarding these events. You did not need to participate in any Second Look events in order to participate in this study. Participating in this study will involve completing a secure online survey which takes about 5 minutes. Your answers will be kept completely anonymous and will not be linked to your email address.**

**Next steps: If you meet our inclusion criteria below and agree to participate, then you will be asked questions regarding the Second Look programming that took place during the 2022-2023 Match cycle. The survey will be administered through REDCap, a HIPAA compliant, secure survey management application hosted at SUNY Upstate Medical University. Your responses will be recorded and stored in REDCap, and only the research team has access to this data. The researchers will never share information that might identify a participant. The de-identified data, including anonymized quotes, may be used in academic research papers, published articles, and conference presentations. Your de-identified information may be used for future research without additional informed consent.**

**Inclusion criteria: Applicant for a Radiation Oncology residency position in the United States during the 2022-2023 Match cycle.**

**Discomforts and risks: The discomforts and risks to you are minimal. Potential risks include feeling uncomfortable answering questions about the residency match process. You have the right to refuse to answer any question at any time. You have the right to stop participating at any time while taking the survey and the right to exit the survey at any point while taking it.**

**Benefits: You will not receive any direct benefits from participating in this research; however, your survey responses will be informative for residency applicants and radiation oncology programs for future residency Match cycles.**

**Statement of confidentiality: You are not required to disclose any personal information, such as name or birthdate. When this research is discussed or published, no one will know that you were in the study. This study was approved by the Institutional Review Board (IRB).**

**Compensation: Participants will not be compensated for their participation.**

**\*\*Eligibility and Consent:\*\***

**By clicking "I consent to participate" below, you agree to participate and to the following:**

**I was an applicant for a Radiation Oncology residency position in the United States during the 2022-2023 Match cycle. I have been informed of the risks and benefits of this research study, and consent to participating in the study.**

---

- I do NOT consent to participate.
  - I consent to participate.
- 

Did you hear about this survey on social media?

- Yes
- No

**Definitions**

**For this survey, we are analyzing "Second Look Events" hosted by Radiation Oncology residency programs, which were open to prospective residents during the 2022-2023 residency match cycle. We are not including any larger institutional graduate medical education (GME) specific Diversity, Equity, and Inclusion (DEI) second look events.**

**Format of the Second Look Event**

**In-person: The applicant was physically on campus Hybrid: The applicant could be physically on campus but comparable virtual activities were offered for applicants unable to attend physically. Virtual: No applicants were physically on campus, all activities were exclusively online using any virtual platform (Zoom, Microsoft Teams, etc.)**

**Please answer the following questions regarding radiation oncology-specific second look events offered during the 2022-2023 residency match cycle.**

Were you offered second look experiences of any kind (in-person, hybrid, virtual)?

- Yes
- No
- Unsure
- Prefer not to answer

In the invitation for the second look event, I was informed that the program rank list would be finalized prior to the event.

- Yes, by all programs
- Yes, by some programs
- No
- Prefer not to answer

I felt the second look offering was truly optional and would not affect my rank to the program.

- Strongly Agree
- Agree
- Neutral
- Disagree
- Strongly Disagree
- Prefer not to answer

How many Radiation Oncology residency programs offered you a second look of any kind (in-person, hybrid, virtual)?

- 0
- 1-3
- 4-6
- 7-9
- 10-12
- 12+
- Prefer not to answer

Of the second look events offered, approximately how many did you attend either virtually or in-person?

- 100%
- 75-99%
- 50-74%
- 25-49%
- 1-24%
- 0%
- Prefer not to answer

**Virtual/Hybrid Second Look**

Were you offered any virtual and/or hybrid Radiation Oncology second looks?

- Yes
- No
- Prefer not to answer

Did you attend any virtual Radiation Oncology second looks?

- Yes
- No
- Prefer not to answer

Why did you choose to attend the virtual second look? (Select all that apply.)

- I still had questions and/or wanted more information.
- I wanted more interaction with the residents and faculty.
- I wanted more interaction with co-applicants.
- I felt obligated to go to remain a competitive applicant.
- Other - please describe
- Prefer not to answer

What other reason(s) did you have for choosing to attend the virtual second look?

If you declined any virtual second looks, what contributed to your decision? (Select all that apply)

- I wasn't interested in the program / not ranking them highly.
- I wasn't available for the scheduled session.
- I didn't feel that an additional virtual meeting would offer much more than other previous virtual interview activities.
- I had "Zoom" fatigue.
- Other - please describe
- Not applicable

What other reason(s) contributed to your decision to decline any virtual second looks?

Attending the second look event virtually influenced my final program rank list.

- Strongly Agree
- Agree
- Neutral
- Disagree
- Strongly Disagree
- Prefer not to answer

---

Attending the second look event virtually provided me with valuable program information that was not apparent during my virtual interview.

- Strongly Agree
- Agree
- Neutral
- Disagree
- Strongly Disagree
- Prefer not to answer

---

Attending the second look event virtually provided me with a better "feel" of the program culture than the virtual interview activities.

- Strongly Agree
- Agree
- Neutral
- Disagree
- Strongly Disagree
- Prefer not to answer

## In-Person Second Look

Were you offered any in-person second look events?

- Yes  
 No  
 Prefer not to answer

Did you attend any in-person Radiation Oncology second looks?

- Yes  
 No  
 Prefer not to answer

Why did you choose to attend the in-person second look? (Select all that apply)

- Interest in the program / intending to rank them highly  
 Ability to physically see the facility  
 Ability to physically experience the city (traffic, restaurants, etc)  
 Interest in meeting other applicants  
 Feeling of obligation to remain a competitive applicant  
 "Meet and Greet" / Informal in-person interaction time with residents and faculty  
 Additional Activities offered (e.g. dinner with residents ± faculty, tours, etc.).  
 Financial incentive (program was offering to offset the cost)  
 Desirable location (e.g. vacation, combining with other travel plans, seeing family)  
 Other - please describe  
 Prefer not to answer

What was your other reason for choosing to attend the in-person second look?

Why did you not choose to attend an in-person second look? (Select all that apply.)

- Not interested in the program / not intending to rank them highly / at all  
 Familiarity with the area  
 Familiarity with the department ("away rotation", internship, research, medical school)  
 Didn't feel the need to physically see the facility and/or city to make the decision  
 Financial considerations/burden  
 Logistical considerations  
 Other - please describe  
 Prefer not to answer

What was your other reason for not choosing to attend the in-person second look?

Attending the second look event in-person influenced my final program rank list.

- Strongly Agree  
 Agree  
 Neutral  
 Disagree  
 Strongly Disagree  
 Prefer not to answer

---

Attending the second look event in-person provided me with valuable program information that was not apparent during my virtual interview.

- Strongly Agree
- Agree
- Neutral
- Disagree
- Strongly Disagree
- Prefer not to answer

---

Attending the second look event in-person provided me with a better "feel" of the program culture than the virtual interview activities.

- Strongly Agree
- Agree
- Neutral
- Disagree
- Strongly Disagree
- Prefer not to answer

---

I felt that there were barriers preventing me from attending a second look with an in-person component.

.

- Strongly Agree
- Agree
- Neutral
- Disagree
- Strongly Disagree
- Prefer not to answer

---

If you faced any barriers to attending an on-site second look, please select all that apply:

.

- Your medical school required a rotation with limited absence policy
- Being a resident with limited scheduling flexibility
- Residing outside of the USA and needing a visa
- Financial burden
- Family obligations
- Other - please describe
- Prefer not to answer

---

What other barrier(s) did you face to attending an on-site second look?



**Demographic Information**

During the residency interview season for the 2022-2023 residency match cycle, I was considered which kind of applicant according to the NRMP:

- US MD senior
- US DO senior
- US MD graduate
- US DO graduate
- US citizen IMG
- non-US citizen IMG
- Other - please describe
- Prefer not to answer

Other kind of applicant \_\_\_\_\_

For my gender, I self-identify as:

- Female
- Male
- Transgender Female
- Transgender Male
- Gender variant/non-confirming
- Not listed - please describe
- Prefer not to answer

I self-identify as: \_\_\_\_\_

I identify as a member of the following ethnicities/race (select all that apply):

- White/Caucasian
- Latino/Latina
- Black or African American
- Asian
- Native American or Alaskan Native
- Native Hawaiian or other Pacific Islander
- Other - please describe
- Prefer not to answer

Other ethnicity/race: \_\_\_\_\_

The primary location where I lived during the interview cycle was in the following region:

- Northeast (ME, NY, NJ, VT, MA, RI, CT, NH, PA)
- Midwest (OH, MI, IN, IL, WI, MN, IA, MO, ND, SD, NE, KS)
- South (MD, DE, DC, VA, WV, NC, SC, GA, FL, KY, TN, AL, MS, AR, OK, LA, TX)
- West (MT, WY, CO, NM, ID, UT, AZ, NV, WA, OR, CA)
- Pacific (AK, HI)
- U.S. territory
- Outside of the U.S. and it's territories
- Prefer not to answer
