# Supplementary material for: Applicant and Program Director Perceptions of Second Look Events During the 2023 Radiation Oncology Residency Match
Source: PubMed Central journal article supplement — Adv Radiat Oncol. 2024 Feb 16;9(6):101473. doi: 10.1016/j.adro.2024.101473 (PMC11043851; doi:10.1016/j.adro.2024.101473), 2024-02-16
Supplement: mmc2.pdf [file mmc2.pdf]

# Program Directory Survey

**You are being asked to participate in a voluntary research study. The purpose of the study is to describe the Second Look events that were hosted by Radiation Oncology residency programs during the 2022-2023 Match cycle, and to evaluate the potential impact of Second Look programs on Match outcomes. Participating in this study will involve completing a secure online survey which takes about 5 minutes. Your answers will be kept completely anonymous and will not be linked to your email address.**

**Next steps: If you meet our inclusion criteria below and agree to participate, then you will be asked questions regarding Second Look programming that took place during the 2022-2023 Match cycle. The survey will be administered through REDCap, a HIPAA compliant, secure survey management application hosted at SUNY Upstate Medical University. Your responses will be recorded and stored in REDCap, and only the research team has access to this data. The researchers will never share information that might identify a participant. The de-identified data, including anonymized quotes, may be used in academic research papers, published articles, and conference presentations. Your de-identified information may be used for future research without additional informed consent.**

**Inclusion criteria: Program director for a Radiation Oncology residency program in the United States.**

**Discomforts and risks: The discomforts and risks to you are minimal. Potential risks include feeling uncomfortable answering questions about the residency match process. You have the right to refuse to answer any question at any time. You have the right to stop participating at any time while taking the survey and the right to exit the survey at any point while taking it.**

**Benefits: You will not receive any direct benefits from participating in this research; however, your survey responses will be informative for residency applicants and radiation oncology programs for future residency Match cycles.**

**Statement of confidentiality: You are not required to disclose any personal information, such as name or birthdate. When this research is discussed or published, no one will know that you were in the study. This study was approved by the Institutional Review Board (IRB).**

**Compensation: Participants will not be compensated for their participation.**

**\*\*Eligibility and consent:\*\***

**By clicking "I consent to participate" below, you agree to participate and to the following:**

**I am a program director for a Radiation Oncology residency program in the United States. I**

**have been informed of the risks and benefits of this research study, and consent to participating in the study.**

- I do NOT consent to participate.
- I consent to participate.

## Definitions

**For the purpose of this survey, we are not including any larger institutional graduate medical education (GME) specific second looks, only second looks hosted by the Radiation Oncology program and/or department.**

### Format of the Second Look Event

**In-person: The applicant was physically on campus Hybrid: The applicant could be physically on campus but comparable virtual activities were offered for applicants unable to attend physically. Virtual: No applicants were physically on campus, all activities were exclusively online using any virtual platform (Zoom, Microsoft Teams, etc.) Informal vs. Formal In-Person Second Look Offer**

**Informal aka "Standing Offer": Program offered to accommodate a site visit for any applicants but no formal date or schedule of events was provided. Formal: Programs offered an official itinerary of events and/or programming on predetermined date(s).**

**Please answer the following questions regarding radiation oncology-specific second look opportunities offered during the 2022-2023 residency match cycle.**

Prior to the COVID-19 pandemic (2019-2020 residency match cycle or earlier), did your program offer optional virtual recruiting opportunities for radiation oncology residency of any kind (for example, virtual "meet and greet" or program overviews)?

- Yes
- No
- Prefer not to answer

Prior to the COVID-19 pandemic (2019-2020 residency match cycle or earlier), did your program offer any optional radiation oncology-specific second looks of any kind?

- Yes: In-person - with formalized schedule of events
- Yes: In-person - informal schedule / standing offer to visit the department
- Yes: Hybrid - in-person and virtual
- Yes: Virtual only
- No
- Other - please explain
- Prefer not to answer

Other radiation oncology-specific second look

Following the beginning of the COVID-19 pandemic (2020-2021 residency match cycle or later), did your program offer any optional virtual recruiting opportunities for radiation oncology residency of any kind (for example, virtual "meet and greet" or program overviews)?

- Yes
- No
- Prefer not to answer

During the 2022-2023 residency match cycle, did your program offer an optional radiation oncology-specific second look of any kind?

- Yes
- No
- Prefer not to answer

Do you plan on utilizing the new NRMP Program Rank Order List (ROL) voluntary locking option to offer Second Look Offering for this upcoming recruitment season?

- Yes
- No
- Unsure
- I prefer not to answer

---

Why didn't your program offer an optional second look? (Select all that apply.)

- Not interested / didn't see the added value
- Was unaware this was an option and that other programs were offering them
- Institutional policy (hospital, GME) did not allow
- Ethical concerns
- Financial Limitations
- Concerns about NRMP rules / fines
- Other - please describe
- Prefer not to answer

---

Other reason your program didn't offer an optional second look?

---

I feel that not offering a second look was detrimental in our recruitment efforts.

- Strongly Agree
- Agree
- Neutral
- Disagree
- Strongly Disagree
- Prefer not to answer

**Offered a Second Look**

Who was invited to your second look?

- All applicants offered an interview, regardless of interview status
- All applicants offered and completed the interview
- Select applicant population - please describe
- Prefer not to answer

Please describe the select applicant population

Did messaging regarding the second look offering discuss it being optional vs. mandatory?

- Yes
- No
- Prefer not to answer

Did messaging regarding the second look offering discuss it not affecting the Rank Order List?

- Yes
- No
- Prefer not to answer

The second look offering was truly optional and did not affect our program's Rank Order List in any way.

- Strongly Agree
- Agree
- Neutral
- Disagree
- Strongly Disagree
- Prefer not to answer

How many second look sessions were offered? Enter a number. If an informal standing offer, please enter "X". \_\_\_\_\_

What format was used for the second look?

- In-person - with formalized schedule of events
- In-person - informal schedule / standing offer to visit the department
- Hybrid - in-person and virtual
- Virtual only
- Other - please explain
- Prefer not to answer

Other format used for the second look:

---

When was/were the second look(s) scheduled? (Select all that apply.)

- November
- December
- January
- Early February (Feb 1 - Feb 14) - before submitting Rank Order List
- Early February (Feb 1-Feb 14) - after submitting Rank Order List
- Late February (Feb 15-Feb 28) - before submitting Rank Order List
- Late February (Feb 15- Feb 28) - after submitting Rank Order List
- Prefer not to answer

---

Which items were gifted to applicants in-person or via postage for the second look? Please do not include any gifts related to the interview. (Select all that apply.)

- Food - includes meals, snacks, and beverages
- Printed literature on the program / department
- Logoed items - mugs / cups, pens, lanyard, bags
- Gift card / vouchers
- None
- Other - please describe
- Prefer not to answer

---

Other item(s) that were gifted to applicants in-person or via postage for the second look.

---

If your program offered a second look with an in-person component, what aspects were financially covered by your institution/department? (Select all that apply.)

- Travel (airfare, gas reimbursement, etc.)
- Meals
- Accommodation / Lodging (hotel, housing with a resident)
- Prefer not to answer

---

If your program offered an in-person second look, what activities were offered? (Select all that apply.)

- Pre "second look" dinner with residents ± faculty
- Informative lecture about the department
- Physical tour of the facility
- Physical tour of the city
- "Meet and Greet" / Informal interaction time with residents
- "Meet and Greet" / Informal interaction time with program leadership
- "Meet and Greet" / Informal interaction time with faculty
- Other - please describe
- Prefer not to answer

---

Other activities offered at in-person second look.

---

If you have any additional thoughts or concerns regarding second looks, please enter them below.

## Demographics

Number of total residents in your program.

- 1-4
- 5-8
- 9-12
- 13-16
- 17 or more
- Prefer not to answer

How many residency candidacy spots did you recruit for in the 2022-2023 residency match cycle with a July 2024 (PGY2) start date?

- 0
- 1
- 2
- 3
- 4
- 5
- 6
- 7
- Prefer not to answer

Approximate number of applicants interviewed in the 2022-2023 residency match cycle for July 2024 (PGY2) start date.

- 0
- 1-20
- 21-40
- 41-60
- 61-80
- 81-100
- 100+
- Prefer not to answer

The primary location of your residency program is in the following region.

- Northeast (ME, NY, NJ, VT, MA, RI, CT, NH, PA)
- Midwest (OH, MI, IN, IL, WI, MN, IA, MO, ND, SD, NE, KS)
- South (MD, DE, DC, VA, WV, NC, SC, GA, FL, KY, TN, AL, MS, AR, OK, LA, TX)
- West (MT, WY, CO, NM, ID, UT, AZ, NV, WA, OR, CA)
- Pacific (AK, HI)
- Prefer not to answer
